1 **Testing the maintenance of natural responses to survival-relevant calls in the conservation**  
2 **breeding population of a critically endangered corvid (*Corvus hawaiiensis*)**

3 Anne C. Sabol<sup>1,2\*</sup>, Alison L. Greggor<sup>1</sup>, Bryce Masuda<sup>1</sup>, Ronald R. Swaisgood<sup>1</sup>

4 <sup>1</sup>**Conservation Science and Wildlife Health, San Diego Zoo Wildlife Alliance, Escondido,**  
5 **USA**

6 <sup>2</sup>**Department of Biological Sciences, Florida International University**

7 \*Corresponding author: Anne Sabol, [acsabol72@gmail.com](mailto:acsabol72@gmail.com)

8

9 **Abstract**

10 Vocal communication serves an important role in driving animals' social interactions and  
11 ultimately their survival. However, both the structure of and responses towards natural vocal  
12 behavior can be lost or subject to alteration under human care. Determining if animals in  
13 conservation breeding programs exhibit and respond appropriately to species-specific  
14 vocalizations is therefore important for ensuring their survival post-release. We tested whether  
15 endangered 'alalā (*Corvus hawaiiensis*), which are extinct in nature, have retained their natural  
16 responses to vocal calls that would be linked to survival and reproduction in the wild. We  
17 conducted our studies on breeding populations derived from a small number of founding 'alalā  
18 maintained under human care since their extinction in the wild in 2002. We presented pairs of  
19 'alalā with alarm, territorial intrusion, and two types of control playback calls (a non-threatening  
20 territorial maintenance call and a novel heterospecific call). 'Alalā were significantly more likely  
21 to approach the speaker following alarm call playback than other call types, and were more likely  
22 to respond to territorial intrusion calls with the same aggressive territorial calls. Males were more  
23 likely to make these aggressive calls than females, mirroring their roles in territory defense. We  
24 also found individual consistency in the level of vocal behavior response across all call types,

25 indicating that some individuals are more vocal than others. These results are encouraging,  
26 showing that ‘*alalā* exhibit relevant, species-specific behaviors despite generations under human  
27 care. They do illustrate, however, that not all individuals respond appropriately, so vocal response  
28 may be an important factor to consider in determining the release suitability of individuals.

29

### 30 **Significance Statement**

31       Effective communication is crucial to the survival of many animals, but can erode  
32 without natural selection. Therefore, testing the flexibility and maintenance of communication  
33 and vocal responses in contexts where animals are isolated from conspecifics or from survival  
34 consequences, such as in conservation breeding centers, can help determine species’  
35 susceptibility to communication loss. We used playbacks of survival-related conspecific calls to  
36 test if ‘*alalā* (*Corvus hawaiiensis*), retained species-specific responses to these calls after  
37 generations under human care. We found that birds maintained a species-level natural response,  
38 however these natural responses were not consistent across individuals, suggesting that some  
39 birds may not be well equipped to survive in the wild without additional training or care.

40

41 **Keywords** anti-predator, captive breeding, communication, corvid, translocation, territory  
42 defense, vocalization

43

### 44 **Acknowledgements**

45 We greatly appreciate the wildlife care specialists at KBCC and MBCC who accommodated this  
46 research and thank Patrick Hart for lending us recording equipment. We would also like to thank  
47 members of the Catenazzi and Cox labs for their feedback on an earlier draft and to Ramona

48 Rauber for helpful discussion about ‘alalā call types. We would like to thank Jeffrey Podos in his  
49 role as an editor and two anonymous reviewers for their feedback.

50

## 51 **Declarations**

## 52 **Funding**

53 Funding for ‘Alalā conservation breeding efforts was provided by the U.S. Fish and Wildlife  
54 Service, Hawaii Division of Forestry and Wildlife, anonymous donors, and San Diego Zoo  
55 Wildlife Alliance

## 56 **Conflicts of Interest**

57 The authors have no conflicts of interest to declare that are relevant to the content of this article.

## 58 **Availability of data and material**

59 Data and code are available on the OSF repository at: <https://osf.io/pu5fb/>. Pre-print available at:  
60 <https://www.biorxiv.org/content/biorxiv/early/2021/05/25/2021.05.24.445466.full.pdf>

## 61 **Code availability**

62 Data and code are available on the OSF repository at: <https://osf.io/pu5fb/>.

## 63 **Ethics approval**

64 This work using animal subjects was approved by San Diego Zoo Wildlife Alliance’s IACUC  
65 committee (No. 16-009). Several permits were issued for the conservation breeding of ‘alalā  
66 (USFWS Native Endangered Species Recovery Permit TE060179-5, State of Hawaii Protected  
67 Wildlife Permit WL19-16).

68

## 69 **Introduction**

70           Animals have evolved mechanisms for communication that facilitate survival and  
71 reproduction. For primarily vocal species, how individuals respond to conspecific vocal cues and  
72 signals can have survival-relevant consequences. For instance, failing to respond to an alarm call  
73 could result in predation, or failing to adequately broadcast territorial calls could cause a loss of  
74 territory, mates, or offspring. Whether or not animals exhibit appropriate species-specific  
75 communication is particularly important in conservation breeding programs. Animals that have  
76 spent generations under human care need to retain their natural behaviors for successful return to  
77 the wild (Rabin 2003; McPhee 2004 a, b). However, behavioral erosion is a common byproduct  
78 when animals are held under human care, resulting in the loss of survival-relevant behaviors,  
79 deviations from wild-type behavior in form, or the expression of behaviors in inappropriate  
80 contexts. These alterations in behavioral phenotype can occur developmentally in a single  
81 generation or genetically/epigenetically across generations, and have been documented across a  
82 wide variety of vertebrate species for many functional categories of behavior, including  
83 antipredator, locomotory, foraging, refuge use, and reproductive, competitive and other social  
84 behaviors (Frankham 2008; Grueber et al. 2015; Grueber et al. 2017). The loss of survival-relevant  
85 behaviors (McPhee and Carlstead 2010; Shier 2016), including losses in vocal diversity (Corfield  
86 et al. 2008; Digby et al. 2013) and dialect drift (Lewis et al. 2021) can alter call functionality and  
87 compromise reintroduction programs using animals bred under human care. A combination of  
88 forces from evolution, culture (Brakes et al. 2019), and direct experience interact to shape animals'  
89 vocal behaviors (Hollén and Radford 2009; Bradbury and Vehrencamp 2011), all of which may  
90 be impacted by the altered environment in conservation breeding facilities. Management of  
91 animals under human care, therefore, faces the challenge of providing opportunities for animals to  
92 maintain and express these behaviors in preparation for release into the wild (Greggor et al. 2018).

93           Among the vocal signals that animals need to retain, anti-predator signals (alarm calls) are  
94 particularly important because they are a component of an animal's defense against predators  
95 (Hollen and Radford 2009). Developmentally, they may be more canalized, with alarm call  
96 production and responses emerging in development without direct experience with predators.  
97 While learning is undoubtedly important for fine-tuning production and responses to antipredator  
98 calls (Seyfarth and Cheney 1980; Griffin et al. 2000), selection should favor individuals that  
99 respond appropriately to alarm calls without direct experience associating alarm calls with  
100 predation, therefore they should be relatively resistant to loss in comparison to other call types.  
101 However, some antipredator behavior responsiveness can be lost over an individual's lifetime in  
102 the absence of predator exposure (Muralidhar et al. 2019). The importance of antipredator alarm  
103 calling for conservation breeding and translocation programs is underscored by the finding that  
104 predation is one of the primary causes of mortality for animals after release to the wild, across  
105 taxonomically diverse species (Fischer and Lindenmayer 2000; Moseby et al. 2011; Berger-tal et  
106 al. 2020).

107           Another important set of signals helps animals avoid conspecific conflict by alerting others  
108 to their shared or defended resources. Territorial species, for instance, have evolved multiple forms  
109 of communication that broadcast an intent to defend their territory. From ornamental displays, to  
110 physical demonstrations (e.g., Decourcy and Jenssen 1994), or auditory signals (Greenfield and  
111 Minckley 1993), there are a variety of ways that animals communicate territory occupancy to avoid  
112 unnecessary conflict. These calls often serve to communicate motivation and a level of severity of  
113 the territorial threat (Mager et al. 2012), ranging from maintenance calls to aggressive intrusion  
114 calls. The ability to efficiently set up and defend a territory can be critical to breeding and later  
115 reproductive success (Hiebert et al. 1989). Therefore, for territorial species that rely on vocal

116 communication, having an ability to understand and respond to different territorial calls may be  
117 crucial for survival and reproduction in the wild. Any divergence in the production or perception  
118 of these important calls from wild phenotypes may challenge social integration and the success of  
119 translocation outcomes (Lewis et al. 2021).

120         Here we examine the communication system of the endangered ‘alalā (*Corvus hawaiiensis*)  
121 within conservation breeding facilities, with the goal of evaluating their responses to major  
122 categories of conspecific vocal signals. Ultimately, we aim to determine if they have retained  
123 important components of natural behaviors that will facilitate successful reintroduction. The ‘alalā,  
124 or Hawaiian crow, is the last remaining corvid species of the Hawaiian islands (Banko et al. 2002).  
125 They were a keystone species for the Hawaiian wet and mesic forests, and the only known seed  
126 disperser for a number of native plants (Culliney et al. 2012). They went extinct in the wild in  
127 2002, after decades of rapid decline due to disease, habitat loss/fragmentation and invasive  
128 predators, today surviving only in conservation breeding facilities (USFWS 2009). Efforts are  
129 ongoing to reintroduce ‘alalā back into the wild, yet the birds still face a long road to recovery and  
130 have not yet demonstrated successful breeding in the wild.

131         There have been but a few studies on ‘alalā vocal behavior, yet we know they have a diverse  
132 vocal repertoire (Tanimoto et al. 2017a). Based on the complexity of vocal communication in other  
133 corvids (Enggist-Dueblin and Pfister 2002) and the role it plays in their social lives (Clayton and  
134 Emery 2007), we would expect ‘alalā calls to broadcast varying vocal signals, containing  
135 information about predators or conspecific territorial intrusions, with potentially important fitness  
136 consequences. ‘Alalā are fiercely territorial as adults, but as juveniles they form flocks, and  
137 associate with members of both sexes. Historically, breeding pairs, and especially males, would  
138 make a number of different, frequent territorial broadcast calls on the edges of their large territories

139 (Banko et al. 2002); Additionally, like many species, ‘alalā are known to employ a range of alarm  
140 calls to warn others of danger (Tanimoto et al. 2017a; Greggor et al. 2021); although it is currently  
141 unknown if the structural differences between ‘alalā alarm call types are used to distinguish  
142 functional call categories. While comparatively little was known about ‘alalā calls when the  
143 species became extinct in the wild, evidence suggests that the frequency and type of some calls  
144 they make in the conservation breeding centers differ from their historical vocal behavior in the  
145 wild, including in the categories of territorial and alarm calls (Tanimoto et al. 2017b). It is unclear  
146 whether these changes are due to the erosion of natural behavior in the conservation breeding  
147 facilities, or due to a lack of context for expressing wild-type calls, for example, a lack of predation  
148 pressure resulting in a reduced need for alarm calls. Additionally, given that they are housed at  
149 much higher densities than wild ‘alalā and suffer reproductive consequences from close proximity  
150 of conspecifics (Flanagan et al. 2020), it is possible that individuals in the conservation breeding  
151 population have become desensitized to their social surroundings, and no longer respond  
152 appropriately to these important signals, especially given that corvids have been shown to ignore  
153 unreliable callers (Wascher et al. 2015). Thus far there have been no studies examining behavioral  
154 responses to experimental playbacks of vocal calls in ‘alalā, beyond a preliminary pilot that  
155 identified alarm call types (i.e. Greggor et al. 2021). Given how little is known about the vocal  
156 behavior of ‘alalā in the wild before they went extinct, any future insight into call types and  
157 function must study the population under human care, however, we acknowledge that  
158 interpretations of the current fitness consequences of call function should be interpreted cautiously  
159 in light of these knowledge gaps.

160         We conducted an investigation of ‘alalā responses to vocal signals to better understand  
161 vocal communication and behavior of this near-extinct species. Specifically, we examined whether

162 ‘alalā still respond to species-specific calls in ways that indicate a retained meaning, despite their  
163 generations removed from nature, or whether their responses to conspecific call playbacks are  
164 indicative of a loss of vocal signals under human care, a call for concern that portends poor social  
165 integration and antipredator defense upon release. We presented birds with recorded playbacks of  
166 alarm and aggressive territory intrusion calls, alongside control calls and sounds, and measured  
167 how likely birds were to approach the calling sound and to respond to it with the same call type or  
168 a different call type (Table 1). We chose these two call types in the context of preparing birds for  
169 survival alongside predators and the maintenance of social skills necessary for setting up and  
170 defending territories from conspecifics. We also presented ‘alalā with two control calls to rule out  
171 the effect of the social novelty and auditory novelty of hearing a call outside of their aviary.  
172 Namely, we played a non-threatening ‘alalā territorial maintenance call, which birds routinely  
173 make from their existing territories, and should therefore not broadcast any threat, and a call from  
174 a novel species that ‘alalā have never heard.

175 If the environment of the conservation breeding facility has reduced birds’ responses to  
176 auditory stimuli generally (i.e. desensitization), we would expect that ‘alalā produce no response  
177 to any of the call types (neither approaching nor making calls of their own), suggesting that the  
178 birds are over-stimulated. Responding naturally to one category, but not all of them, could indicate  
179 that some calls have lost their referential meaning either due to a lack of context for expression or  
180 as an artefact of generations of conservation breeding. Meanwhile, if birds have retained their  
181 natural responses to alarm and territorial intrusion calls, we would expect to see differences  
182 between them and control call types. Specifically, birds should respond to territorial intrusion calls  
183 with their own aggressive territorial intrusion calls (Bradbury and Vehrencamp 2011), and this  
184 effect should be most pronounced in males, due to the larger role males historically played in



185 territorial defense (Banko et al. 2002). For alarm calls, the natural response is more complicated.  
186 We would expect birds to approach the source of the call to investigate the potential source of  
187 danger, and may respond with alarm calls (Hill 1986; Manser et al. 2002). Meanwhile the birds  
188 should not show any clear response to the general territorial maintenance call, since it does not  
189 denote a threat, and may show signs of neophobia, or a hesitancy to approach, the novel call, since  
190 ‘*‘*alalā are highly neophobic in other contexts (Greggor et al. 2020).

191

## 192 **Methods**

193 We conducted the experiment on 28 breeding pairs, i.e. 62% of the entire ‘*‘*alalā breeding  
194 population, at the Keauhou Bird Conservation Center (KBCC; n = 24 pairs) and the Maui Bird  
195 Conservation Center (MBCC; n = 4 pairs) between September and November 2018. The birds at  
196 both facilities are currently several generations removed from the wild. Birds were tested in their  
197 home enclosure with their breeding partner. Each pair was housed in an outdoor aviary, with  
198 covered areas for shelter and feeding, and had daily ad libitum access to food and water.  
199 Throughout the facility, interaction with people is minimized to reduce the effects of human care  
200 (see Greggor et al. 2018). The birds have auditory access to other breeding pairs and most do not  
201 have visual access. For the few buildings with more than one pair in adjacent aviaries we only  
202 tested one pair per building to minimize subjects’ prior exposure to the experimental setup. It is  
203 possible that birds could see the experimental setup at adjacent aviaries, so we put as much time  
204 as possible between trials at neighboring aviaries. At KBCC there was an average of 25 days  
205 between trials at neighboring aviaries, though due to scheduling constraints the range was  
206 somewhat large, between 5-53 days between trials at neighboring aviaries. At MBCC due to time  
207 constraints at this facility there were only two pairs of neighboring aviaries, and these trials were

208 done 2 and 3 days apart. Four pairs were physically separated from each other for husbandry  
209 reasons, but both had visual access to each other during all of their trials.

### 210 *Experimental design of playback study*

211 We designed the playback study to determine how ‘alalā respond to alarm and other social  
212 and non-social acoustic stimuli. We hypothesized that responses to different call types will vary  
213 according to the context in which they are used and putative call meaning (Tanimoto et al. 2017a).  
214 The experiment entailed playback of four distinct acoustic stimuli: (1) conspecific alarm call, (2)  
215 conspecific territorial intrusion call, (3) conspecific non-threatening territorial maintenance call,  
216 and (4) heterospecific call from a novel bird species (Table 1). Alarm calls are high-pitched calls  
217 given to warn other birds of danger (Tanimoto et al. 2017a), which are typical of corvid vocal  
218 repertoires (e.g. Marzluff et al. 2010; Bila et al. 2016; McIvor et al. 2018). By contrast, territorial  
219 intrusion calls are given when birds are actively and aggressively defending their territory, in  
220 situations that can escalate into physical aggression. Meanwhile, the non-threatening, territorial  
221 maintenance calls that ‘alalā make routinely on the edges of their territories in the absence of any  
222 direct threat or aggression were included as a conspecific control stimuli.

223 We employed a repeated-measures design in which each subject received playback of each  
224 call type in a balanced, random order ensuring that each type of call was played first, second, third,  
225 or fourth an equal number of times across all trials. Individual and temporal differences in  
226 responsiveness to the experimental setup and acoustic playback can be a source of response  
227 variation that adds statistical noise in playback studies. To address this possibility, we included a  
228 pre-trial period before call playbacks in which subjects were exposed to ambient forest noise  
229 playback (details below). The same forest noise was used as a post-playback stimulus for all trials,  
230 so that conditions were constant for comparisons of observed behavior in pre- and post-call

231 playback periods. We used this comparison to evaluate behavioral changes in the aftermath of call  
232 playbacks.

233

234

235

236 Table 1 Explanation of stimuli types and predicted responses

| Call type                          | Experimental design function                                                                                           | Predicted behavioral responses                                                                     |
|------------------------------------|------------------------------------------------------------------------------------------------------------------------|----------------------------------------------------------------------------------------------------|
| <b>Alarm</b>                       | Evaluate whether ‘alalā retain anti-predator responsiveness to conspecific calls indicating danger or predation threat | Vigilance, alarm calls, cautious approach (predicted to coordinate social anti-predator response)  |
| <b>Territorial<br/>Intrusion</b>   | Discriminate between response to an alarming social stimulus versus an alarming antipredator stimulus                  | Aggressive approach, territorial intrusion calling                                                 |
| <b>Territorial<br/>maintenance</b> | Control: non-alarming conspecific stimulus                                                                             | No specific call response predicted, but ‘alalā could show interest and possible social attraction |

**Novel Control** Control: non-alarming heterospecific stimulus No call response predicted; perhaps hesitancy to approach, based on neophobia.

237

238 *Call recording and playback methods*

239 We collected all audio recordings with a Roland R-05 acoustic recorder and directional  
240 boom microphone. Conspecific calls and forest noise controls were recorded at the KBCC. We  
241 collected calls opportunistically but tried to capture certain situations where we expected birds to  
242 make the calls in question. For example, for territorial intrusion calls we recorded when males  
243 were being moved between aviaries for husbandry purposes, as this is a time when we would  
244 expect these territorial intrusion calls. Additionally, the alarm calls collected were verified against  
245 calls collected at times of recapture at the facility and predatory exposure (e.g. Greggor et al. 2021).  
246 To address pseudoreplication, one set of calls was collected from each of three males, resulting in  
247 three unique sets of conspecific calls. A follow up analysis revealed no difference in birds'  
248 responses between the three sets of calls (see Supplementary Materials). We assigned 'alalā call  
249 types initially by social context and subjective perception, then confirmed assignment by  
250 examining spectrograms. Calls from unfamiliar species were collected opportunistically at the  
251 Panaewa Zoo in Hilo, Hawaii from medium- or large-bodied birds that breeding center 'alalā  
252 would never have experienced (peacock *Pavo cristatus*, cockatoo *Cacatua moluccensis*, and toucan  
253 *Ramphastos toco*). Since several species of corvids are able to distinguish characteristics of  
254 conspecifics from calls (Boeckle et al. 2012; Mates et al. 2015; Woods et al, 2018), each pair  
255 received all three call exemplars from the same male to avoid individual differences in donor birds  
256 influencing responses to call types. As breeding center birds are likely able to hear most

257 conspecifics housed at the same facility, all subjects were likely somewhat familiar with individual  
258 calls from nearby conspecifics. However, to minimize familiarity with calls we selected playback  
259 calls from individuals that were not housed in adjacent aviaries and did not repeat call playback  
260 sets at adjacent aviaries.

261 We ensured that calls in the same category from different males had similar delta frequency  
262 and average power using Raven Pro, version 1.5. In order to standardize the duration and number  
263 of calls between call types with different durations and pauses, we ascertained that each 30-second  
264 stimulus contained 6-7 seconds of sound and between 6-20 individual calls, ensuring the natural  
265 spacing that the bird used between individual sounds to the extent possible. Therefore, we did not  
266 edit the calls themselves but did edit the spacing between calls and the number of calls to keep the  
267 total sound duration to 6-7 seconds for all kinds of stimuli. We measured sound duration and  
268 conducted all audio editing in Audacity. We also checked that all sounds in the same category  
269 were played from the speaker (omni jacket ultra, Altec Lansing) at the same minimum and  
270 maximum decibel level using the Decibel X app for iphones.

271 All playback trials were conducted between 9:30am and 11:30am, when morning  
272 husbandry-related disturbance had finished. Also, this time window is not within the species-  
273 specific period of peak vocal activity that have been historically reported (0600 to 0900 and 1500  
274 to 1800; Banko et al. 2002), to attempt to avoid times where there could be background noise from  
275 other aviaries that might otherwise cause a distraction. For each playback trial we placed the  
276 speaker on the ground in a standardized location on the side of the aviary, along an opaque wall  
277 on the outside of the aviary. While the birds may have known a person was outside the aviary, they  
278 were unable to directly see the observer placing the speaker. We allowed the subjects a 5-min  
279 habituation period after the observer placed the speaker and moved to the observation location.

280 Each of four trials consisted of three different observation periods: pre-trial (3-min playback of  
281 forest noise to control for general response to sound playback), stimulus presentation (0.5-min call  
282 playback), and post-trial (3-min forest noise playback repeated). Following a 19-min intermission,  
283 we repeated the three-period trial using a different call type. This playback routine was repeated  
284 for all four calls in balanced, randomized order across individuals. This resulted in 30 minutes  
285 between stimulus presentations. The observer scored trials live through a small window at the front  
286 of the aviary and recorded trials by setting up a video camera at each window. Because the stimuli  
287 were auditory and trials were scored live, it was not possible to record data blind. The birds likely  
288 heard the observer enter, but once the 5-minute habituation began, the observer stayed quiet and  
289 out of view as much as possible. Therefore, it is possible that the birds were aware of the presence  
290 of the observer and video camera, but we tried to minimize disturbance as much as possible. We  
291 scored trials live but consulted video recordings to improve data accuracy. We recorded the  
292 following behaviors across all three trial periods: (1) approach (bird approaches playback speaker,  
293 measured as a binary variable with any movement of the bird in the direction of the speaker  
294 counting as an approach); (2) latency to approach (time at which bird first moved in the direction  
295 of the stimulus); (3) number and (4) type of all calls made by each bird. Call types were classified  
296 into four categories: alarm, territorial intrusion, subordinate begging and other. Territorial  
297 maintenance calls were never made in response to the stimuli so they were not included in the  
298 models.

### 299 *Analysis*

300 All analyses were conducted in R version 3.4.1 (R core team 2017). In order to determine  
301 if our pre-trial conditions were consistent for each stimulus, we ran a generalized linear mixed  
302 model (GLMM) with a negative binomial distribution (as data were zero inflated; Bliss et al. 1953)

303 and a log link function, using the package glmmTMB (version 0.2.3; Brooks et al. 2017), with the  
304 number of all calls made during the pre-trial as the response variable. The initial model included  
305 the main effects of stimulus type and order as well as the interactions between stimulus type and  
306 order. We also included the random effect of bird ID.

307 To investigate the degree of individual consistency in call responses, we ran an intraclass  
308 correlation using the package irr (version 0.84; Gamer et al. 2012) for the number of calls each  
309 individual produced during the stimulus and post-trial combined for each stimulus type.

310 In order to determine interest in different stimuli, we ran a cox proportional hazards model  
311 using the package survival (version 2.38; Therneau 2015) on the likeliness of birds to approach  
312 the stimulus for each stimulus type. This model included stimulus type, sex, and order as main  
313 effects as well as the interaction between stimulus type and sex and stimulus type and order. We  
314 clustered data around bird ID.

315 To evaluate the circumstances influencing call production, we used generalized linear  
316 mixed models (GLMM) with a negative binomial distribution (as data were zero inflated) and a  
317 log link function, using the package glmmTMB (version 0.2.3; Brooks et al. 2017) to separately  
318 test whether all calls, alarm calls, territorial intrusion calls and begging calls were more likely to  
319 occur during the stimulus and post-trial period depending on the playback type. All models initially  
320 included the main effects of stimulus type, sex, and trial order as well as the interactions between  
321 stimulus type and sex and stimulus type and order. We also included the random effect of bird ID.  
322 We used the territorial maintenance control call as the reference group when comparing the  
323 different stimulus types as this should represent a conspecific call in a new location, so this  
324 accounts for any calls or approaches simply due to the social novelty and not the call itself. The

325 GLMM with the number of territorial intrusion calls made during the stimulus and post-trial would  
326 not converge properly when the model included interactions, so only main effects were tested.

327 For all GLMMs except for the model with territorial intrusion calls as the response variable,  
328 we first determined if the interaction terms warranted inclusion in the models. Starting with the  
329 interaction between stimulus type and order, as this was likely less biologically relevant, and then  
330 continuing with the interaction between stimulus type and sex, we removed interaction terms if  
331 their inclusion failed to decrease AIC values by  $> 2$ . We did not simplify the model past  
332 determining which interactions to include, as all remaining effects were important variables we  
333 wanted to consider in the final model. See the supplementary materials for the full process of  
334 model selection for each response variable. For all GLMMs we also visually inspected binned  
335 plots of the expected versus residual values for the final model.

336

## 337 **Results**

### 338 *Pre-trial call frequency in response to playback of forest noise*

339 As expected, we found no differences in call number among treatments before stimulus  
340 exposure during the pre-trial period (alarm trial vs. territorial maintenance: GLMM,  $b = -1.008$ ,  $z$   
341  $= -0.942$ ,  $P = 0.346$ ; novel control trial vs. territorial maintenance:  $b = -0.836$ ,  $z = -0.804$ ,  $P =$   
342  $0.421$ ; territorial intrusion trial vs. territorial maintenance:  $b = -0.677$ ,  $z = -0.665$ ,  $P = 0.506$ ).  
343 Therefore, we have not weighted post-trial data as a function of pre-trial calling rates. However,  
344 bird calls significantly increased across trials ( $b = 0.769$ ,  $z = 2.179$ ,  $P = 0.029$ ); therefore, we  
345 included trial order in all subsequent models.

### 346 *Approach latency during stimuli presentation*



347 Birds were more likely to approach after the alarm stimulus than the territorial  
348 maintenance stimulus (Fig. 1b; alarm vs. territorial maintenance: Cox Proportional Hazards  
349 Model, coefficient = 1.293,  $z = 2.293$ ,  $Pr = 0.0218$ ) whereas the other stimuli had no significant  
350 effect on the likelihood of approaching compared to the territorial maintenance stimulus (Fig. 1a;  
351 novel control compared to territorial maintenance: coefficient = 0.827,  $z = 1.608$ ,  $Pr = 0.108$ ;  
352 territorial intrusion versus territorial maintenance: coefficient = 0.479,  $z = 0.892$ ,  $Pr = 0.372$ ).  
353 Trial order was also significant, with birds more likely to approach in later trials (coefficient =  
354 0.242,  $z = 1.997$ ,  $Pr = 0.0458$ ). Sex did not have a significant effect on the likelihood of  
355 approaching (effect of sex: coefficient = 0.115,  $z = 0.376$ ,  $Pr = 0.707$ ).

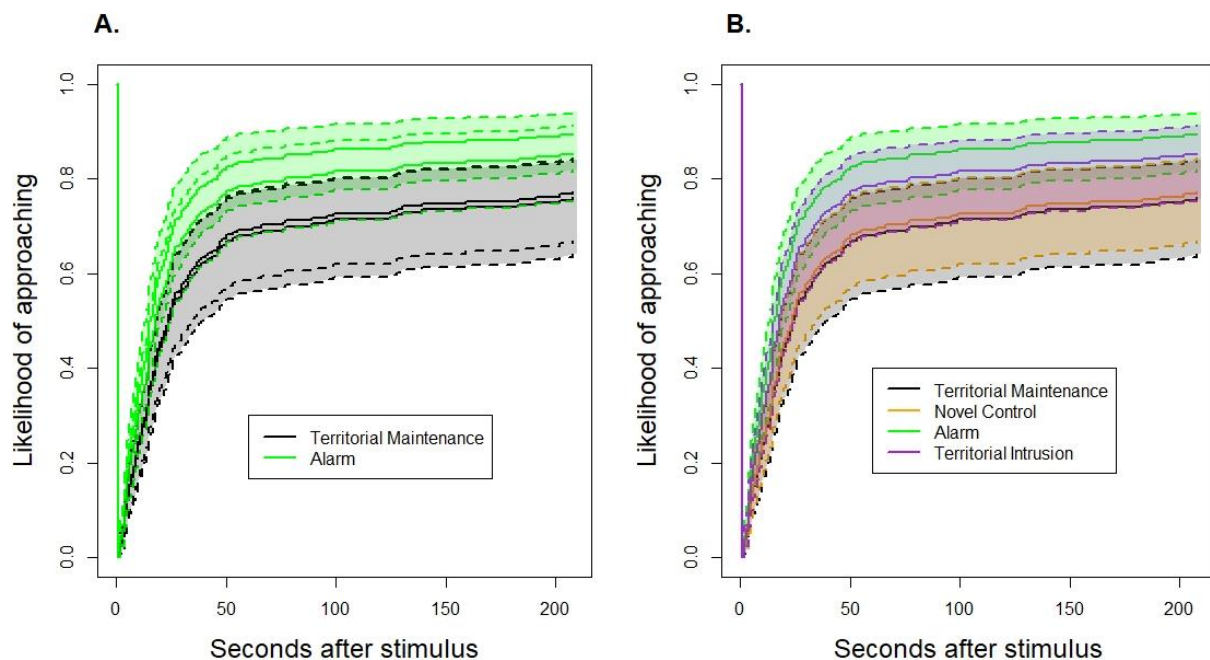

356

357 Fig. 1 a Inverted survival curves (solid lines) showing the likelihood that birds approach in  
358 response to only the two significantly different stimuli, territorial maintenance and alarm  
359 (represented by the corresponding colors in the legend) with a 95% confidence interval (dotted  
360 lines). b Inverted survival curves (solid lines) showing the likelihood that birds approach each  
361 stimulus type (represented by the corresponding colors in the legend) with a 95% confidence  
362 interval (dotted lines).

363

364

365 *Individual call consistency during stimuli presentation and post-trial*

366 Birds were individually consistent in the total number of calls they each made during the  
367 stimulus and post-trial periods across all different trial treatments (Intraclass correlation  
368 coefficient, 0.367, CI = 0.231-0.515,  $P < 0.001$ ); i.e., birds who made fewer calls in one type of  
369 trial also made fewer calls in all trials.

370 *Call responses*

371 Even though birds differed individually in the number of calls they made across all  
372 stimuli, no patterns emerged in how many calls birds made between stimuli types during the  
373 playback and post-trial period combined (Fig. 2; alarm vs. territorial maintenance: GLMM,  $b =$   
374  $0.497$ ,  $z = 0.737$ ,  $P = 0.461$ ; novel control vs. territorial maintenance:  $b = 0.271$ ,  $z = 0.408$ ,  $P =$   
375  $0.683$ ; territorial intrusion vs. territorial maintenance:  $b = 1.007$ ,  $z = 1.471$ ,  $P = 0.141$ ).

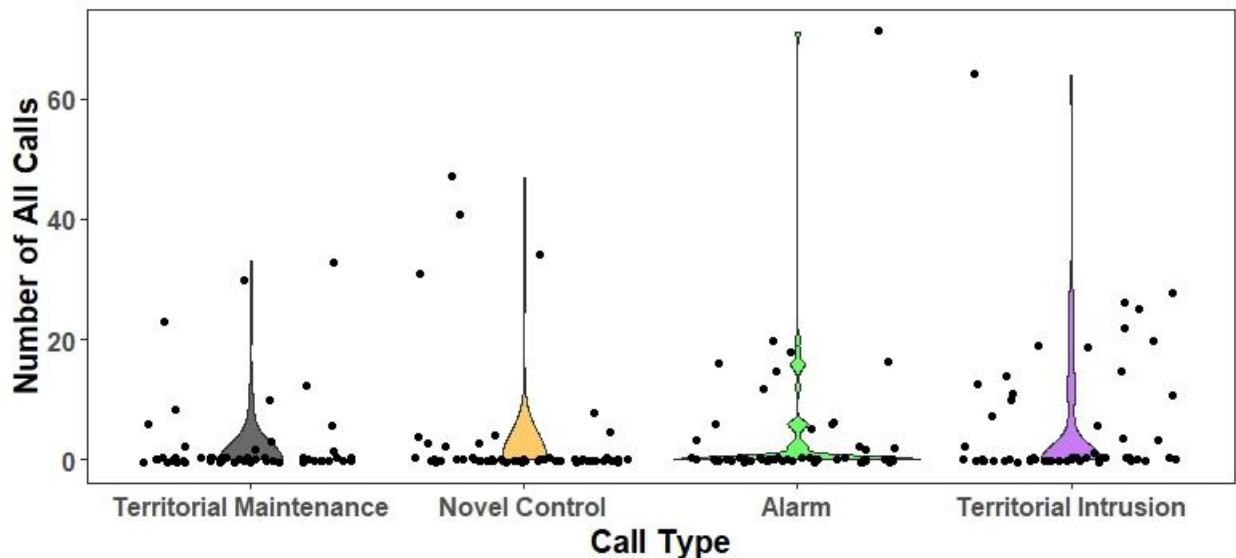

376

377 Fig. 2 Violin plots and raw data showing the distribution of the number of all calls birds made  
378 during the stimulus and post-trial period after each type of stimulus. The points are the raw data  
379 for each individual trial, jittered to reduce point overlap.

380 There was also no effect of sex ( $b = -0.598$ ,  $z = -1.211$ ,  $P = 0.226$ ) or order ( $b = 0.099$ ,  $z = 0.394$ ,  
381  $P = 0.693$ ) on the total number of calls birds made during the stimulus and post-trial.

382 When we looked at the production of specific calls, we found that the number of alarm calls  
383 birds made during the stimulus and post-trial combined did not significantly vary between any of  
384 the different stimuli (Fig. 3; alarm stimulus vs. territorial maintenance:  $b = -1.584$ ,  $z = -1.093$ ,  $P =$   
385  $0.275$ ; novel control stimulus vs. territorial maintenance:  $b = 0.169$ ,  $z = 0.097$ ,  $P = 0.923$ ; territorial  
386 stimulus vs. territorial maintenance:  $b = 0.390$ ,  $z = 0.312$ ,  $P = 0.755$ ). All other terms were not  
387 significant.

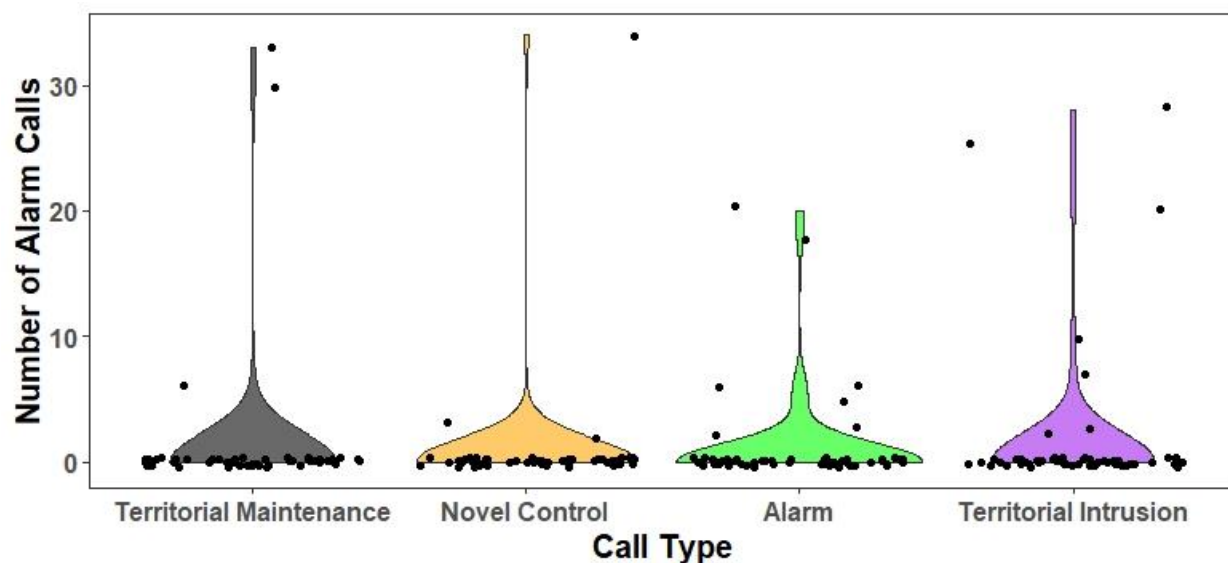

389 Fig. 3 Violin plots and raw data showing the distribution of the number of alarm calls birds made  
390 during the stimulus and post-trial period after each type of stimulus. The points are the raw data  
391 for each individual trial, jittered to reduce point overlap.

392 There was also no difference in the number of begging calls birds made during the stimulus and  
393 post-trial between any of the stimuli (alarm stimulus vs. territorial maintenance:  $b = 0.820$ ,  $z =$   
394  $0.665$ ,  $P = 0.506$ ; novel control vs. territorial maintenance:  $b = -0.193$ ,  $z = -0.170$ ,  $P = 0.865$ ;  
395 territorial intrusion stimulus vs. territorial maintenance:  $b = -0.441$ ,  $z = -0.409$ ,  $P = 0.683$ ). Birds  
396 never made the territorial maintenance call in response to any stimuli.

397 Overall, birds made significantly more territorial intrusion calls during the stimulus and  
398 post-trial period in response to the territorial intrusion stimulus than to the territorial maintenance  
399 stimulus (Fig. 4;  $b = 3.825$ ,  $z = 2.298$ ,  $P = 0.022$ ) whereas they did not make a significantly  
400 different amount of territorial calls during the stimulus and post-trial period in response to any  
401 other kind of stimulus (Fig. 4; alarm stimulus vs. territorial maintenance:  $b = 2.033$ ,  $z = 1.064$ ,  $P$   
402  $= 0.287$ ; novel control vs. territorial maintenance:  $b = -19.797$ ,  $z = -0.002$ ,  $P = 0.999$ ).

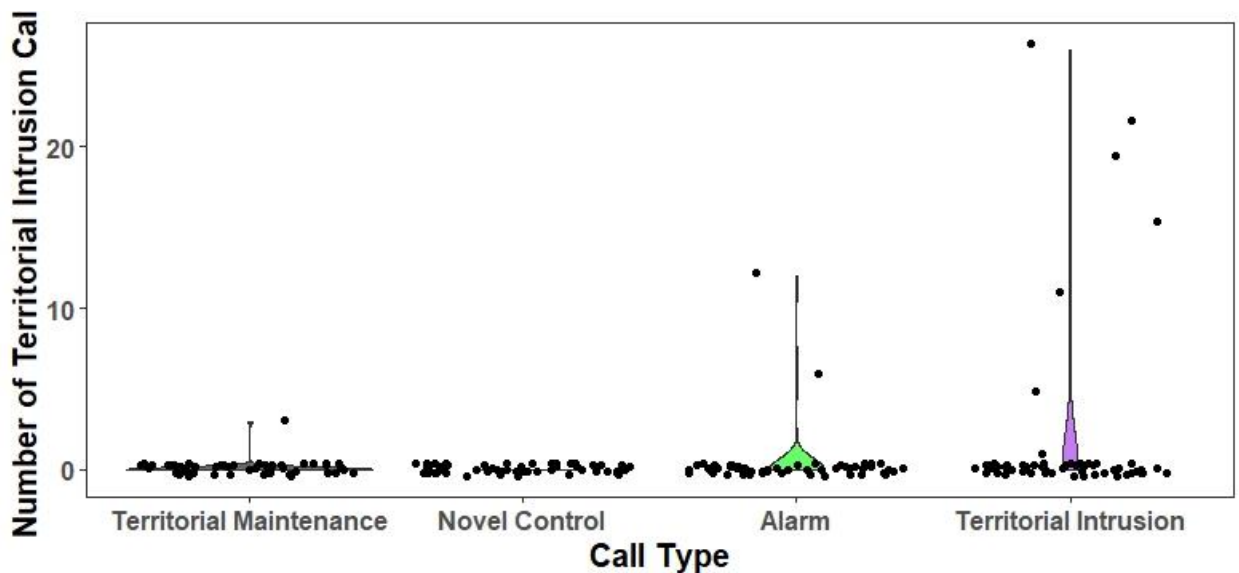

403

404 Fig. 4 Violin plots and raw data showing the distribution of the number of territorial intrusion  
405 calls birds made during the stimulus and post-trial period after each type of stimulus. The points  
406 are the raw data for each individual trial, jittered to reduce point overlap.

407 Males made significantly more territorial intrusion calls during the stimulus and post-trial  
408 than did females (Fig. 5;  $b = 5.087$ ,  $z = 3.106$ ,  $P = 0.002$ ).

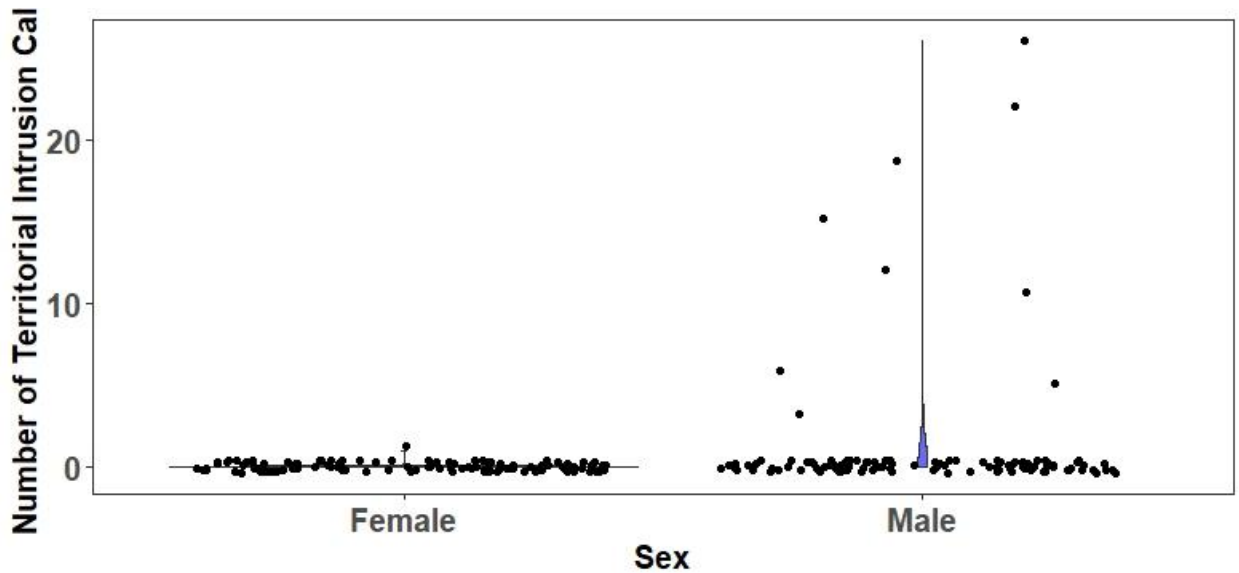

409

410 Fig. 5 Violin plots and raw data showing the distribution of the number of territorial intrusion  
411 calls males and females made during the stimulus and post-trial period after each type of  
412 stimulus. The points are the raw data for each individual trial, jittered to reduce point overlap.

### 413 Discussion

414 Species raised under human care have the potential to lose some of their survival-relevant  
415 behaviors (McPhee and Carlstead 2010; Shier 2016), including responses to species-specific  
416 vocalizations (Corfield et al. 2008; Digby et al. 2013; Tanimoto et al. 2017b). Conservation  
417 breeding programs or managed care may also change selective forces operating across generations  
418 or developmental processes operating during individuals' lifetimes, creating new cultural vocal  
419 variants and response patterns (Lewis et al. 2021). Disrupting the normal signaler-receiver  
420 interplay may result in a breakdown in the communication system, with fitness consequences  
421 challenging conservation goals. To address these possibilities, we tested whether pairs of 'alalā  
422 have maintained responses to survival-relevant classes of vocalizations. Although the conservation  
423 breeding history of the species may have reduced some of their responses, we still saw encouraging  
424 signs that 'alalā were able to distinguish between natural call types and demonstrate responses that  
425 may be linked to increased survival in the wild. Specifically, we found that 'alalā were more likely

426 to approach in response to alarm calls, indicating they may have been investigating a potential  
427 threat or seeking to coordinate a defensive response with conspecifics. Also, we found that males  
428 in particular were more likely than females to respond to territorial intrusion calls with territorial  
429 intrusion calls of their own, suggesting they were willing to defend their breeding aviary. Finally,  
430 our results illustrate that there is some individual consistency in the amount of calling over all  
431 treatments, but that individual characteristics (e.g. personality or specific rearing history) does not  
432 fully explain the variation in call response to the different treatments. A note of caution in  
433 interpreting these results is warranted due to the absence of any quantitative and limited qualitative  
434 observations of ‘*alalā* vocal behavior before they went extinct in the wild, so we have few reference  
435 points other than comparisons with and generalizations from other species.

436         As a corvid, flexible learning is expected throughout their life (Emery and Clayton 2004),  
437 but vocalizations often require exposure during times of parental care or sensitive periods, which  
438 may be limited under human care (Corfield et al. 2008; Digby et al. 2013; Tanimoto et al. 2017b).  
439 Most ‘*alalā* in this study were puppet-reared by human caretakers (Gregor et al. 2018), removing  
440 any opportunities for learning vocal behavior from parents. Of known call types, alarm calls are  
441 more likely to be preserved since they potentially share some innate characteristics that make them  
442 harder for predators to locate (Maynard et al. 2003). Additionally, animals, including corvids, will  
443 often make alarm calls to elicit assistance from conspecifics in investigating or confronting a  
444 predator (Curio 1978; Coomes et al. 2019). In the case of ‘*alalā*, we found that birds were more  
445 likely to approach alarm call playbacks than other auditory stimuli. However, they were not more  
446 likely to make alarm calls in response to alarm playbacks. This lack of vocal response is consistent  
447 with what was reported in some pilot work on ‘*alalā* anti-predator behavior (Greggor et al. 2021),  
448 suggesting that alarm calls may function to alert birds to the need to gather additional information

449 or that birds may not respond to alarm calls with their own calls in order to avoid drawing the  
450 attention of the threat to themselves. It is also possible that because we presented alarm calls  
451 without other stimuli that could indicate danger, they investigated but did not respond with their  
452 own alarm calls when they saw no clear threat. Further testing of alarm calls with and without  
453 presenting a dangerous context would be necessary to tease this apart. However, ‘*alalā*’s approach  
454 of the source of the playback alone may still have had a social function. The fact that birds  
455 approached the alarm calls (and not just conspecific playbacks in general) suggests they may still  
456 function to elicit social assistance: approach of the caller may precede mobbing or other group  
457 antipredator defense. Although mobbing-like behavior has been anecdotally reported in ‘*alalā*  
458 (Greggor et al. 2021, this study provides some empirical support that the birds responded  
459 appropriately to alarm calls in the absence of other signs of danger and have not become  
460 completely desensitized to them.

461 Territorial calls are also an important part of vocal communication, including in the  
462 historical vocal repertoire of ‘*alalā* (Banko et al. 2002; Tanimoto et al. 2017a). We played two  
463 types of territorial calls, a neutral territorial maintenance call and an aggressive territorial intrusion  
464 call. ‘*Alalā* did not significantly differ in their response to the territorial maintenance call from  
465 other call types. However, we found that ‘*alalā* responded to a simulated territorial intrusion with  
466 territorial intrusion calls significantly more than they did to any other playback stimuli. A vocal  
467 territorial response is the natural reaction we would expect to a territorial challenge (Maynard et  
468 al. 2003; Bradbury and Vehrencamp 2011), considering we presented the birds with this stimulus  
469 in their home aviaries. We did not test any of the birds in a new location outside of their artificial  
470 “territory” so we do not know if their responses are flexible and adaptive to context, i.e. defending  
471 only their occupied territory. However, given that ‘*alalā* exhibit fewer territorial calls than their



472 wild counterparts (Tanimoto et al. 2017b), we find it encouraging that ‘alalā displayed this  
473 behavioral response suggesting some normal signaler-receiver exchange. Additionally, we found  
474 that males were more likely to make territorial intrusion calls, which mirrors patterns noted  
475 previously in the wild (Banko et al. 2002). As a sexually dimorphic species with respect to size,  
476 males are the larger and more aggressive sex, and thus their greater role in territorial defense is  
477 expected (Archer 1988).

478         While we found encouraging signs that some birds exhibited natural responses to our  
479 playbacks in the absence of any other context or stimuli, many of the birds did not respond vocally  
480 when faced with any type of conspecific call. Given that the birds are living in social densities that  
481 are far higher than observed in the wild (Flanagan et al. 2020), the high levels of individual  
482 variation we found suggest that some ‘alalā may have become desensitized to the calls of  
483 conspecifics vocalizations, perhaps a result of repeated exposure without consequence or that  
484 salient context was missing from our stimulus presentations. While ‘alalā in the conservation  
485 breeding facilities may not necessarily be less vocal than wild birds (Tanimoto et al. 2017b), the  
486 lack of vocal behavior we saw in many individuals in response to social cues suggests a potential  
487 decoupling of the meaning or relevance of conspecific calls. Alternatively, perhaps there is  
488 additional context we did not adequately capture in our recordings (e.g. individual caller ID, social  
489 status, etc.), that could have differentially influenced some individuals more than others. Corvids  
490 are known to respond to individual qualities of callers (Boeckle et al. 2012), such as their  
491 dominance status (Massen et al. 2014), and membership in the breeding colony (Woods et al.  
492 2018), with call signatures that may also help with distinguishing sex (Mates et al., 2015).  
493 Additionally, since calls were recorded opportunistically, there may be subtle differences to the  
494 different calls (for example, the particular stimulus causing the alarm calls) that we are unaware



495 of. Therefore, we may have inadvertently broadcast information beyond the content of the calls.  
496 However, we saw no differences in the number of calls birds made in response to the three different  
497 call sets, suggesting that the identity of the caller was not a major cause of variation. A final  
498 explanation for the variation could be that by using recordings of birds in the conservation breeding  
499 centers, which was necessary for controlling context and individual factors such as sex and  
500 identity, the calls themselves may no longer retain the same information as wild calls would have.  
501 Examinations of historical recordings show that similar call types to the ones we broadcast were  
502 used by the last wild birds (Tanimoto et al. 2017a). Although some differences likely exist  
503 (Tanimoto et al. 2017b), the call types we chose were similar to those produced by wild birds, and  
504 the fact that responses were largely consistent with our predictions suggest that the calls used have  
505 retained their function. Regardless of the cause of the low responses of many individuals, there  
506 were still other birds that clearly demonstrated survival-relevant responses.

507         Although we found no evidence of widespread erosion of vocal communication behavior  
508 under human care, the individual differences that we saw in how birds responded to the playbacks  
509 could indicate that not all individuals are equally as well equipped for release into the wild if these  
510 call responses would indeed result in reduced predation risk or increased territory defense in the  
511 wild. Many factors go into determining fitness for release, and these results suggest that we may  
512 need to consider whether birds demonstrate adequate responses to conspecific calls as a criterion  
513 for release. Additionally, future research could investigate how likely birds are to regain survival-  
514 relevant responses to vocalizations if they are exposed to training that encourages associations  
515 between conspecific calls and relevant responses. Given the critical conservation status of the  
516 species, any technique that could limit the impact of the conservation breeding environment on  
517 survival-relevant behavior is warranted.

518

519 **References**

520 Archer J (1988) *The Behavioural Biology of Aggression*. Cambridge University Press,  
521 Cambridge.

522 Banko PC, Ball DL, Banko WE (2002) Hawaiian crow *Corvus hawaiiensis*. In: Poole A, Gill F  
523 (eds) *The Birds of North America*, Cornell Lab of Ornithology.

524 Berger-Tal O, Blumstein DT, Swaisgood RR (2020) Conservation translocations: a review of  
525 common difficulties and promising directions. *Animal Conservation* 23:121–131.

526 Bílá K, Beránková J, Veselý P, Bugnyar T, Schwab C (2017) Responses of urban crows to con-  
527 and hetero-specific alarm calls in predator and non-predator zoo enclosures. *Animal*  
528 *Cognition* 20:43-51.

529 Bliss, C. I., & Fisher, R. A. (1953). Fitting the Negative Binomial Distribution to Biological  
530 Data. *Biometrics*, 9(2), 176–200. <https://doi.org/10.2307/3001850>

531 Boeckle, M., Szipl, G., & Bugnyar, T. (2012). Who wants food? Individual characteristics in  
532 raven yells. *Animal Behaviour* 84, 1123–1130. Bradbury JW, Vehrencamp SL (2011)  
533 *Principles of animal communication*, 2nd  
534 Edn. Sinauer, Sunderland MA.

535 Brakes P, Dall SRX, Aplin LM, Bearhop S, Carroll EL, Ciucci P, Fishlock, V, Ford JKB,  
536 Garland EC, Keith SA, McGregor PK, Mesnick SL, Noad MJ, di Sciara GN, Robbins  
537 MM, Simmonds MP, Spina F, Thornton A, Wade PR, Whiting MJ, Williams J, Rendell  
538 L, Whitehead H, Whiten A, Rutz C (2019) Animal cultures matter for conservation.  
539 *Science* 363:1032-1034.

- 540 Brooks ME, Kristensen K, van Benthem KJ, Magnusson A, Berg CW, Nielsen A, Skaug HJ,  
541 Maechler M, Bolker BM (2017) glmmTMB Balances Speed and Flexibility Among  
542 Packages for Zero-inflated Generalized Linear Mixed Modeling. *The R Journal* 9:378-  
543 400.
- 544 Clayton NS, Emery NJ (2007) The social life of corvids. *Current Biology* 17: 652–656.
- 545 Coomes JR, Mcivor GE, Thornton A (2019) Evidence for individual discrimination and  
546 numerical assessment in collective antipredator behaviour in wild jackdaws (*Corvus*  
547 *monedula*). *Biol Lett* 15:20190380.
- 548 Corfield J, Gillman L, Parsons S (2008) Vocalisations of the North Island Brown Kiwi (*Apteryx*  
549 *mantelli*). *Auk* 125:326–335.
- 550 Culliney S, Pejchar L, Switzer R, Ruiz-gutierrez V, Culliney S, Pejchar L, Switzer R, Ruiz-  
551 gutierrez V (2012) Seed dispersal by a captive corvid: the role of the 'Alalā (*Corvus*  
552 *hawaiiensis*) in shaping Hawai'i's plant communities. *Ecological Applications* 22:1718–  
553 1732.
- 554 Curio WE (1978) The adaptive significance of avian mobbing II: cultural transmission of enemy  
555 recognition in blackbirds effectiveness and some constraints. *Zeitschrift für Tier-*  
556 *psychologie* 48:184–202.
- 557 Decourcy KR, Jenssen TA (1994) Structure and use of male territorial headbob signals by the  
558 lizard *Anolis carolinensis*. *Animal Behaviour* 47:251–262.
- 559 Digby A, Bell BD, Teal PD (2013) Vocal cooperation between the sexes in Little Spotted Kiwi  
560 *Apteryx owenii*. *Ibis* 155:229–245.
- 561 Emery NJ, Clayton NS (2004) The mentality of crows: convergent evolution of intelligence in  
562 corvids and apes. *Science* 306:1903–7.

- 563 Enggist-Dueblin, P., & Pfister, U. (2002). Cultural transmission of vocalizations in ravens,  
564 *Corvus corax*. *Animal Behaviour* 64, 831–841.
- 565 Fischer J, Lindenmayer DB (2000) An assessment of the published results of animal relocations.  
566 *Biological Conservation* 96:1–11.
- 567 Flanagan AM, Rutz C, Farabaugh S, Greggor AL, Masuda B, Swaisgood RR (2020) Inter-aviary  
568 distance and visual access influence conservation breeding outcomes in a territorial,  
569 endangered bird. *Biological Conservation* 242:108429.
- 570 Gamer M, Lemon J, Fellows I, Singh P (2012) irr: Various Coefficients of Interrater Reliability  
571 and Agreement. R package version 0.84. <https://CRAN.R-project.org/package=irr>
- 572 Greenfield MD, Minckley, RL (1993) Acoustic dueling in tarbush grasshoppers: settlement of  
573 territorial contests via alternation of reliable signals. *Ethology* 95:309-326.
- 574 Greggor AL, Masuda B, Gaudioso-Levita JM, Nelson J, White TH, Shier DM, Farabaugh S,  
575 Swaisgood RR (2021) Pre-release training, predator interactions and evidence for  
576 persistence of anti-predator behavior in reintroduced ‘*alalā*, Hawaiian crow. *Global*  
577 *Ecology and Conservation*. 28, e01658.
- 578 Greggor, AL, Masuda B, Sabol AC, Swaisgood RR (in review) Designing anti-predator training  
579 to maximize learning and efficacy assessments. *Biological Conservation*.
- 580 Greggor AL, Vicino GA, Swaisgood RR, Fidgett A, Brenner D, Kinney ME, Farabaugh S,  
581 Masuda B, Lamberski N (2018) Animal Welfare in Conservation Breeding: Applications  
582 and Challenges. *Frontiers in Veterinary Science* 5:1–6.
- 583 Greggor AL, Masuda B, Flanagan AM, Swaisgood RR (2020). Age-related patterns of  
584 neophobia in an endangered island crow: implications for conservation and natural  
585 history. *Animal Behaviour* 160:61–68. doi:10.1016/j.anbehav.2019.12.002

- 586 Griffin AS, Blumstein DT, Evans CS (2000) Training captive-bred or translocated animals to  
587 avoid predators. *Conservation Biology* 14:1317–1326.
- 588 Hiebert SM, Stoddard PK, Arcese P (1989) Repertoire size, territory acquisition and  
589 reproductive success in the song sparrow. *Animal Behaviour* 37:266–273.
- 590 Hill GE (1986) The function of distress calls given by tufted titmice (*Parus bicolor*): an  
591 experimental approach. *Animal Behaviour* 34:590-598.
- 592 Hollén LI, Radford AN (2009) The development of alarm call behaviour in mammals and birds.  
593 *Animal Behaviour* 78:791-800.
- 594 Lewis RN, Williams LJ, Gilman RT (2021). The uses and implications of avian vocalizations for  
595 conservation planning. *Conservation Biology* 35:50-63.
- 596 Mager JN, Walcott C, Piper WH (2012) Male common loons signal greater aggressive  
597 motivation by lengthening territorial yodels. *Wilson Journal of Ornithology* 124:73–80.
- 598 Manser MB, Seyfarth RM, Cheney DL (2002) Suricate alarm calls signal predator class and  
599 urgency. *Trends in Cognitive Sciences* 6:55-57.
- 600 Mates, E. A., Tarter, R. R., Ha, J. C., Clark, A. B., & McGowan, K. J. (2015). Acoustic profiling  
601 in a complexly social species, the American crow: caws encode information on caller sex,  
602 identity and behavioural context. *Bioacoustics* 24, 63–80.
- 603 Massen JJ, Pašukonis A,  
604 Schmidt J, Bugnyar T (2014) Ravens notice dominance reversals among conspecifics  
605 within and outside their social group. *Nature communications* 5: 3679.
- 606 Maynard, Smith J, Harper D (2003) *Animal signals*. Oxford University Press, Oxford.
- 607 McIvor GE, Lee VE, Thornton A (2018) Testing social learning of anti-predator responses in  
608 juvenile jackdaws: the importance of accounting for levels of agitation. *Royal Society  
open science* 5:171571.

- 609 McPhee EM, Silverman ED (2004a) Increased behavioral variation and the calculation of release  
610 numbers for reintroduction programs. *Conservation Biology* 18:705-715.
- 611 McPhee ME (2004b). Generations in captivity increases behavioral variance: considerations for  
612 captive breeding and reintroduction programs. *Biological Conservation* 115:71-77.
- 613 McPhee ME, Carlstead K, (2010) The importance of maintaining natural behaviors in captive  
614 mammals. In: Kleiman D, Thompson K (Eds) *Wild Mammals in Captivity: Principles*  
615 *and Techniques for Zoo Management*, pp 303–213
- 616 Moseby KE, Read J, Paton D, Copely P, Hill B, Crisp H (2011) Predation determines the  
617 outcome of 10 reintroduction attempts in arid South Australia. *Biological Conservation*  
618 144:2863–2872.
- 619 Muralidhar A, Moore FL, Easton LJ, Jamieson IG, Seddon PJ, van Heezik Y (2019) Know your  
620 enemy? Conservation management causes loss of antipredator behaviour to novel  
621 predators in New Zealand robins. *Animal Behaviour* 149:135-142.
- 622 R Core Team (2017) *R: A language and environment for statistical computing*. R Foundation for  
623 *Statistical Computing*, Vienna, Austria. URL <https://www.R-project.org/>.
- 624 Rabin LA (2003) Maintaining behavioral diversity in captivity for conservation: natural  
625 behaviour management. *Animal Welfare* 12:85-94.
- 626 Seyfarth and Cheney. (1980). The Ontogeny of Vervet Monkey Alarm Calling Behavior: A  
627 Preliminary Report. 54(1), 37-56.
- 628 Shier DM (2016) Manipulating animal behavior to ensure reintroduction success. In: Berger-Tal  
629 O, Saltz D (eds) *Conservation Behavior: Applying Behavioral Ecology to Wildlife*  
630 *Conservation and Management*, Cambridge University Press, Cambridge, pp 275–304

631 Tanimoto AM, Hart PJ, Pack AA, Switzer R (2017a) Vocal repertoire and signal characteristics  
632 of 'Alalā, the Hawaiian Crow (*Corvus hawaiiensis*). *The Wilson Journal of Ornithology*  
633 129:25–35.

634 Tanimoto AM, Hart PJ, Pack AA, Switzer R, Banko PC, Ball DL, Sebastián-González E,  
635 Komarczyk L, Warrington MH (2017b) Changes in vocal repertoire of the Hawaiian  
636 crow, *Corvus hawaiiensis*, from past wild to current captive populations. *Animal*  
637 *Behaviour* 123:427–432.

638 Therneau T (2015) A Package for Survival Analysis in S. version 2.38, <URL:[https://CRAN.R-](https://CRAN.R-project.org/package=survival)  
639 [project.org/package=survival](https://CRAN.R-project.org/package=survival)>.

640 US Fish and Wildlife Service (2009) Revised Recovery Plan for the 'Alalā (*Corvus hawaiiensis*).

641 Wascher, C. A. F., Hillemann, F., Canestrari, D., & Baglione, V. (2015). Carrion crows learn to  
642 discriminate between calls of reliable and unreliable conspecifics. *Anim Cogn* 18, 1181–  
643 1185.

644 Woods RD, Kings M, McIvor GE, Thornton A (2018) Caller characteristics influence  
645 recruitment to collective anti- predator events in jackdaws. *Scientific Reports* 7343.

646

647

648

649

650

651

652

653
